# Supplementary material for: RAF kinases are stabilized and required for dendritic cell differentiation and function
Source: PubMed Central journal article supplement (PMC7206131; doi:10.1038/s41418-019-0416-4), 2019-09-20

# Supplementary Figure 1

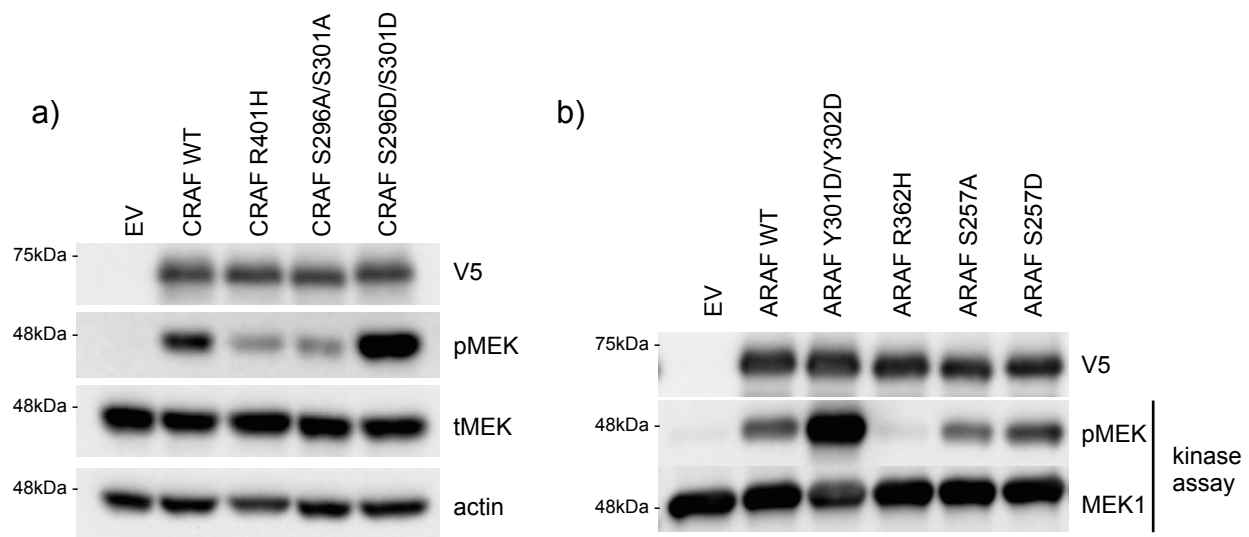

# Supplementary Figure 2

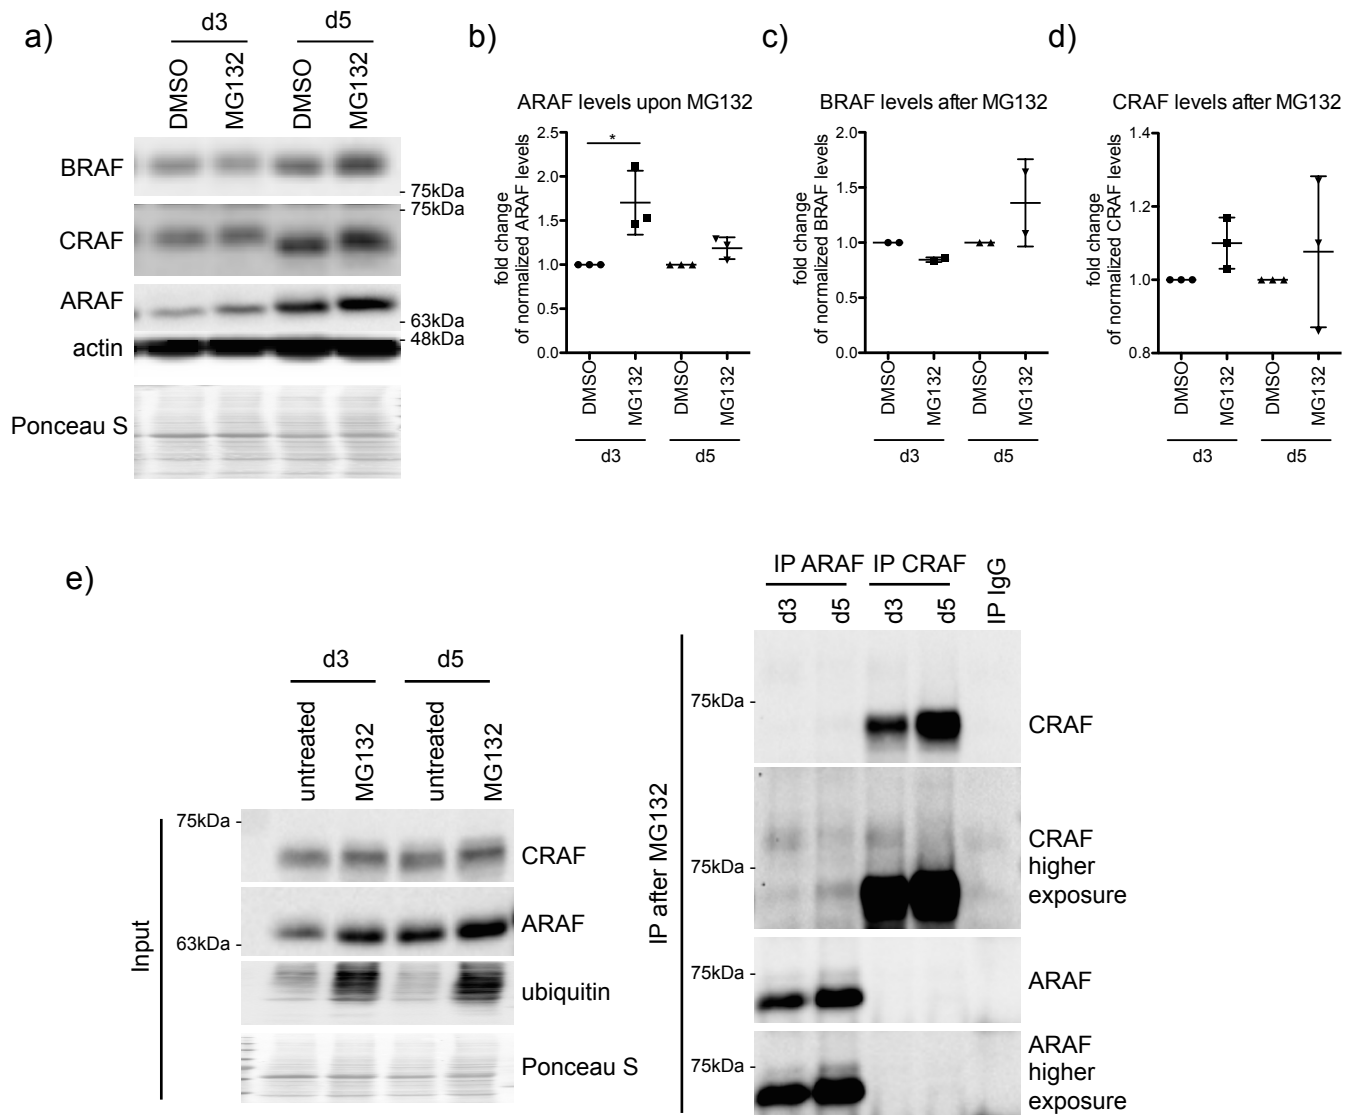

# Supplementary Figure 3

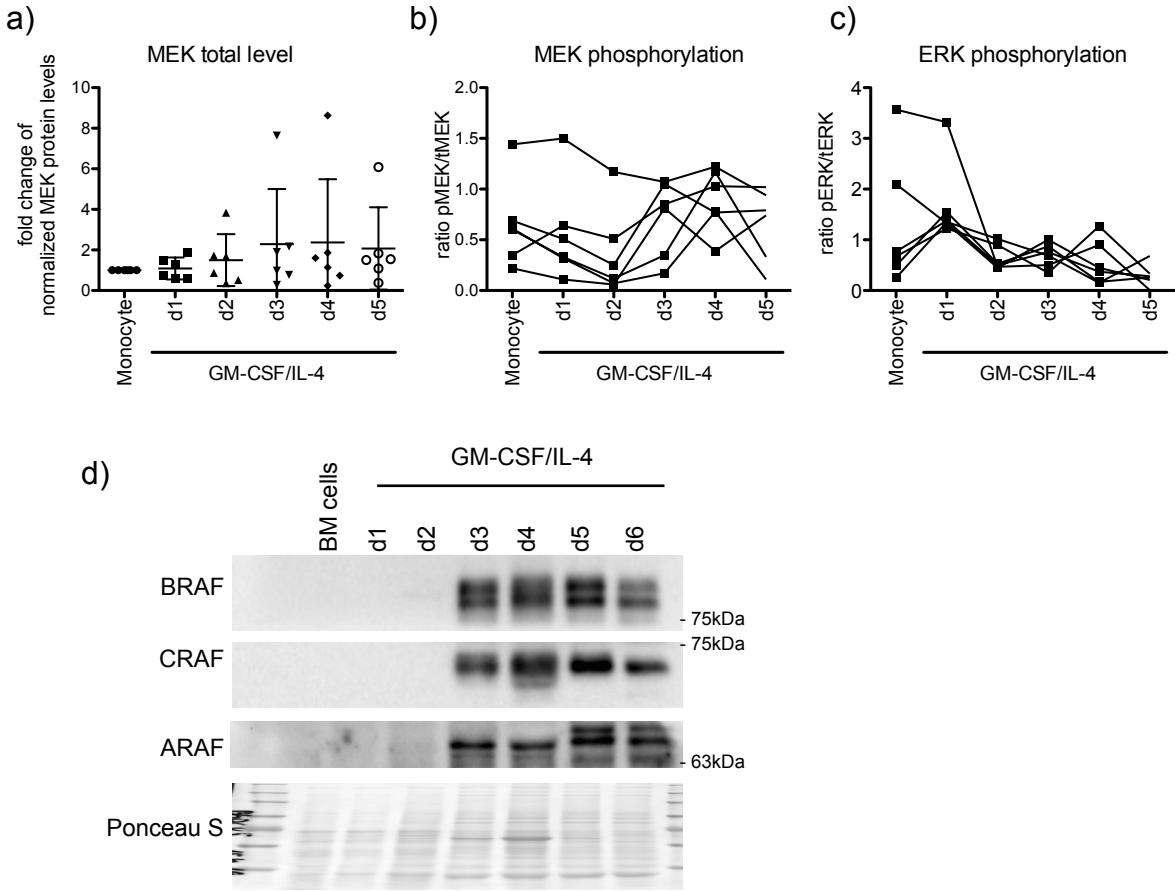

# Supplementary Figure 4

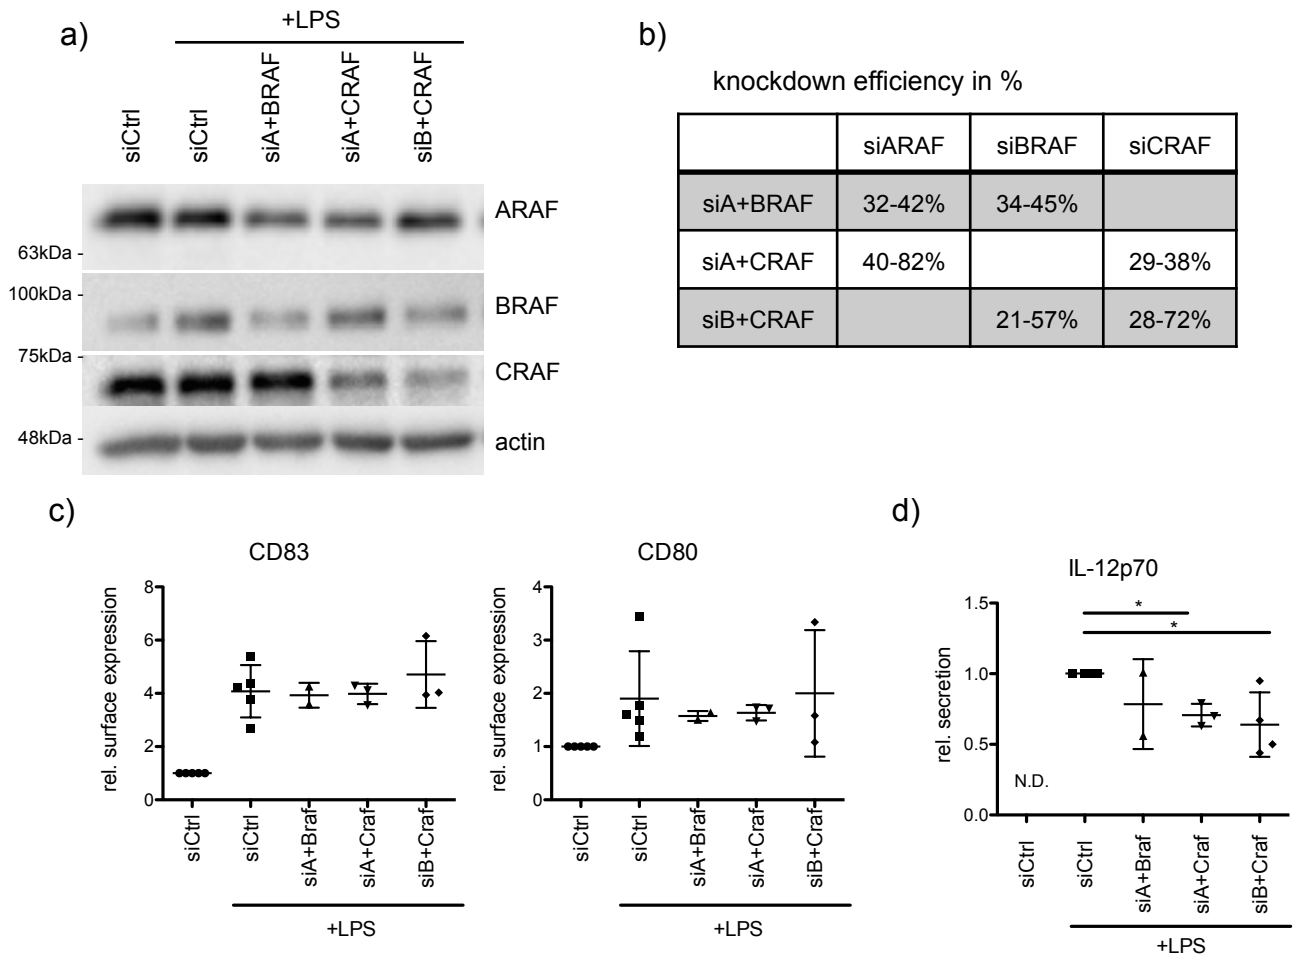

# Supplementary Figure 5

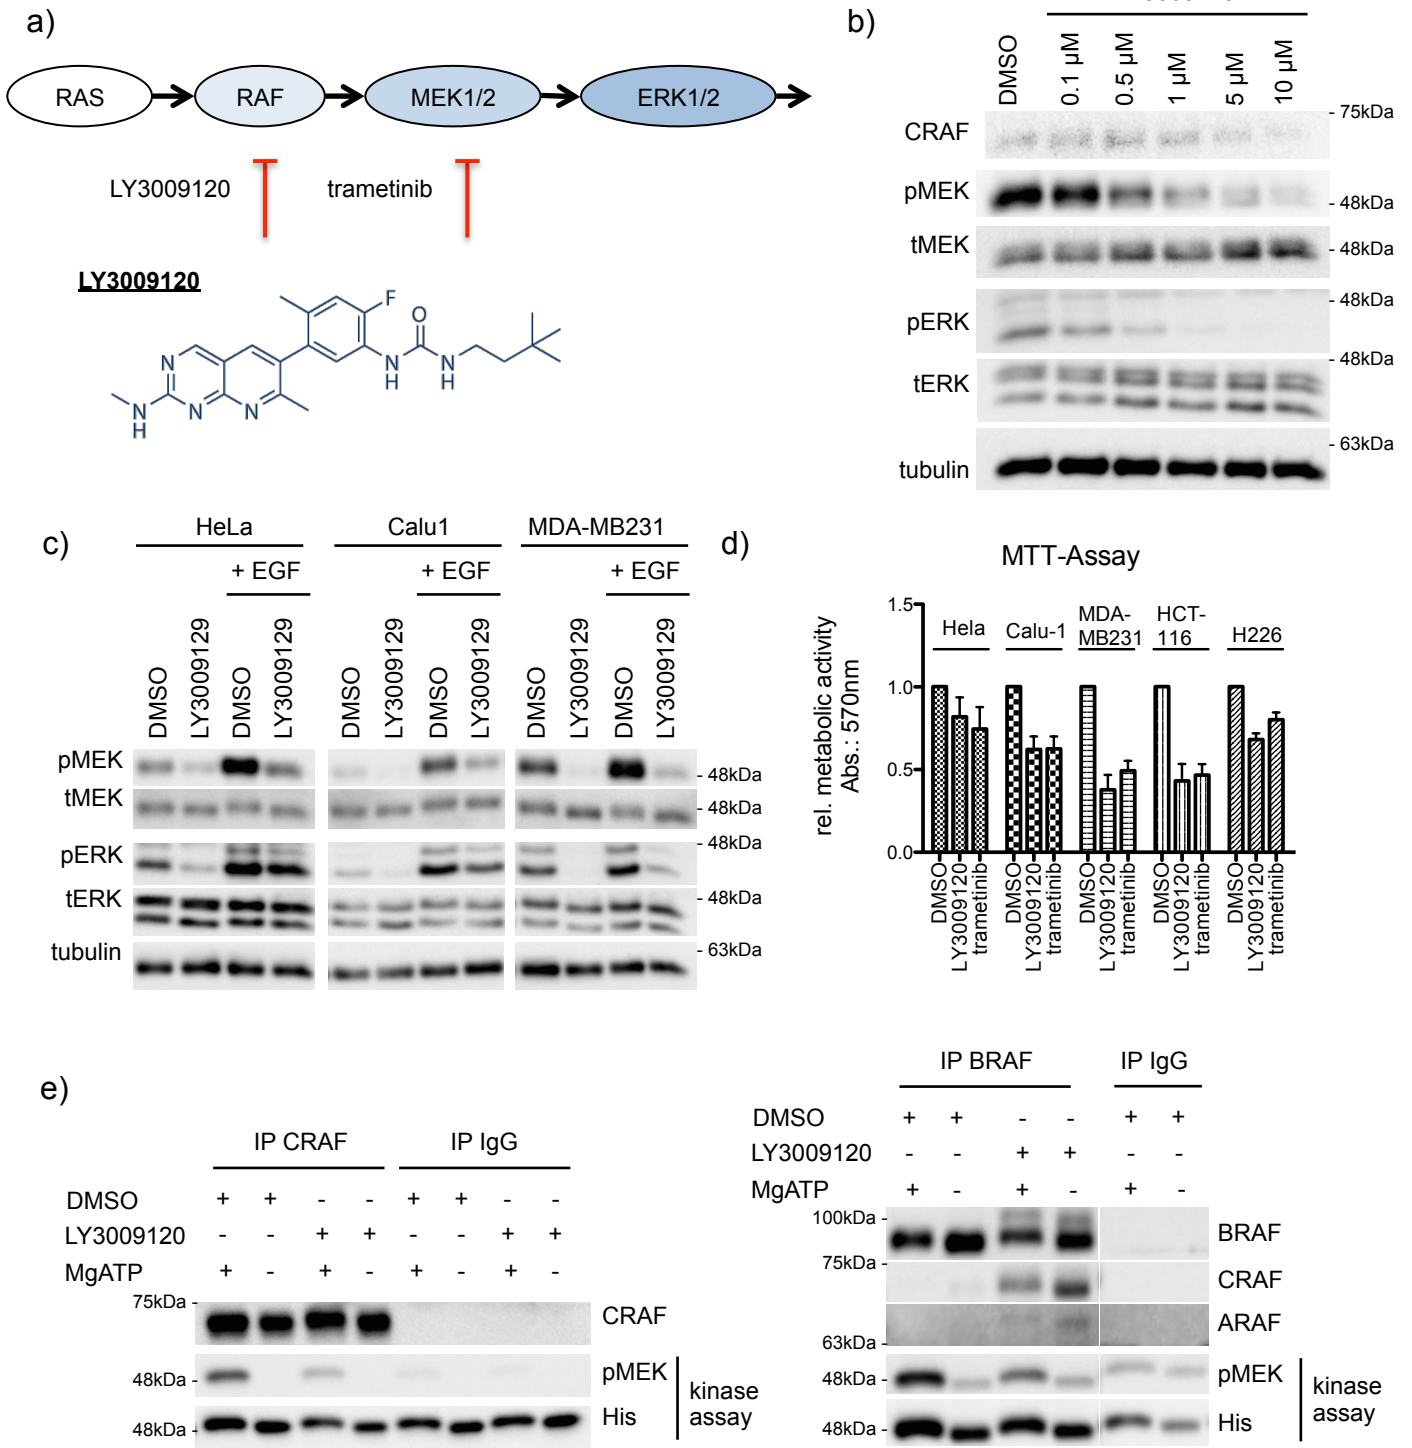

# Supplementary Figure 6

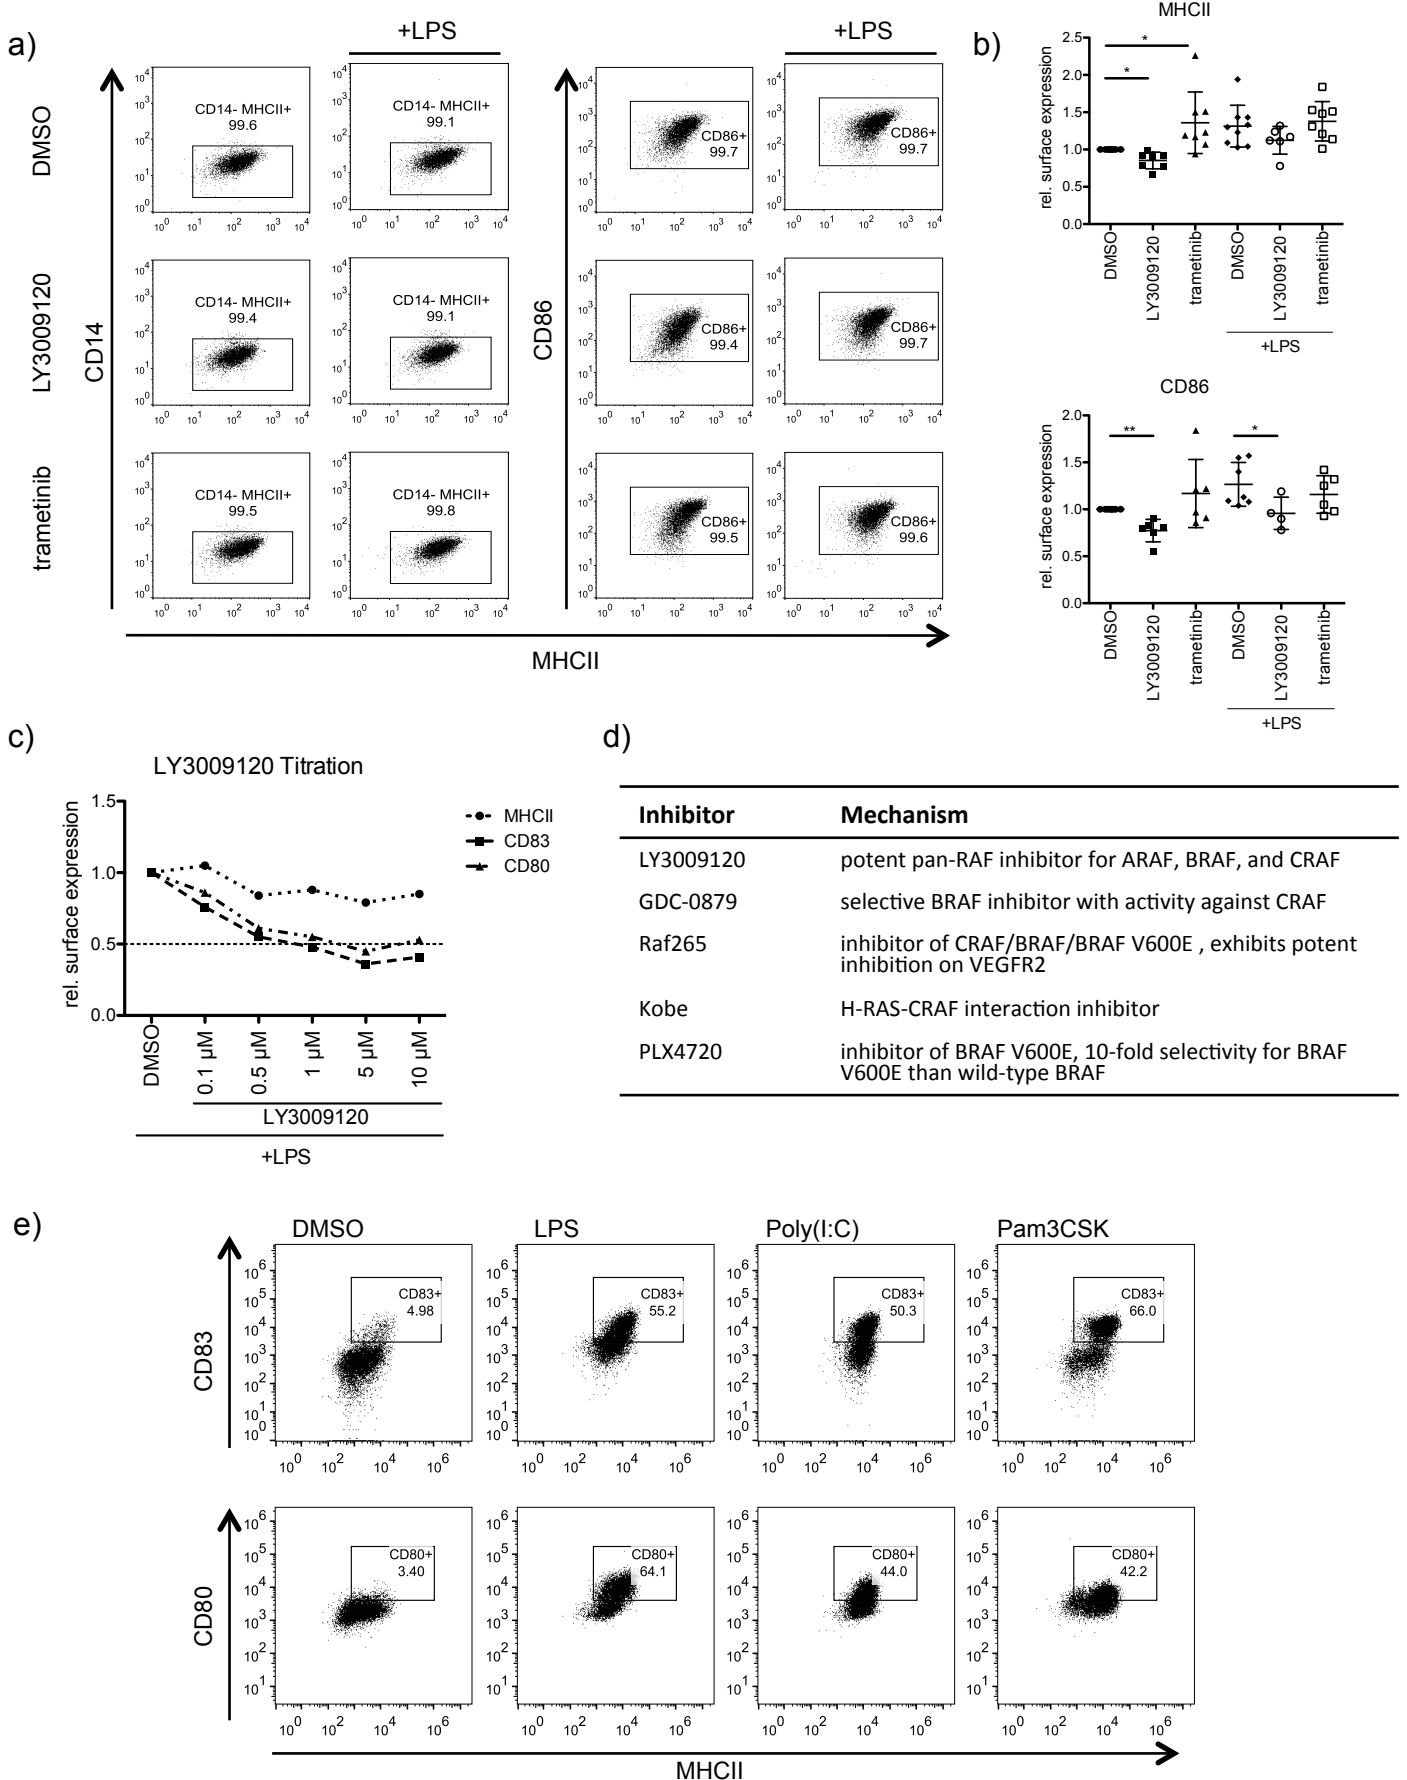

# Supplementary Figure 7

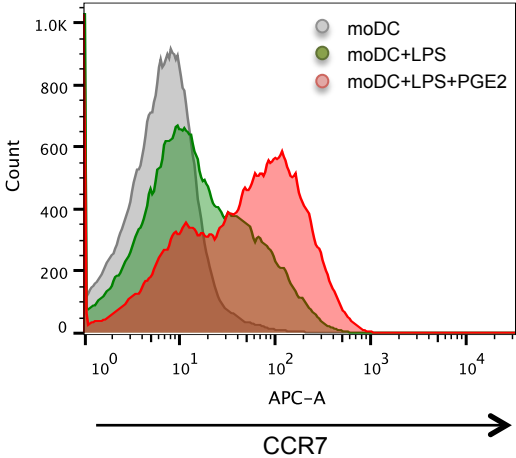

# Supplementary Figure 8

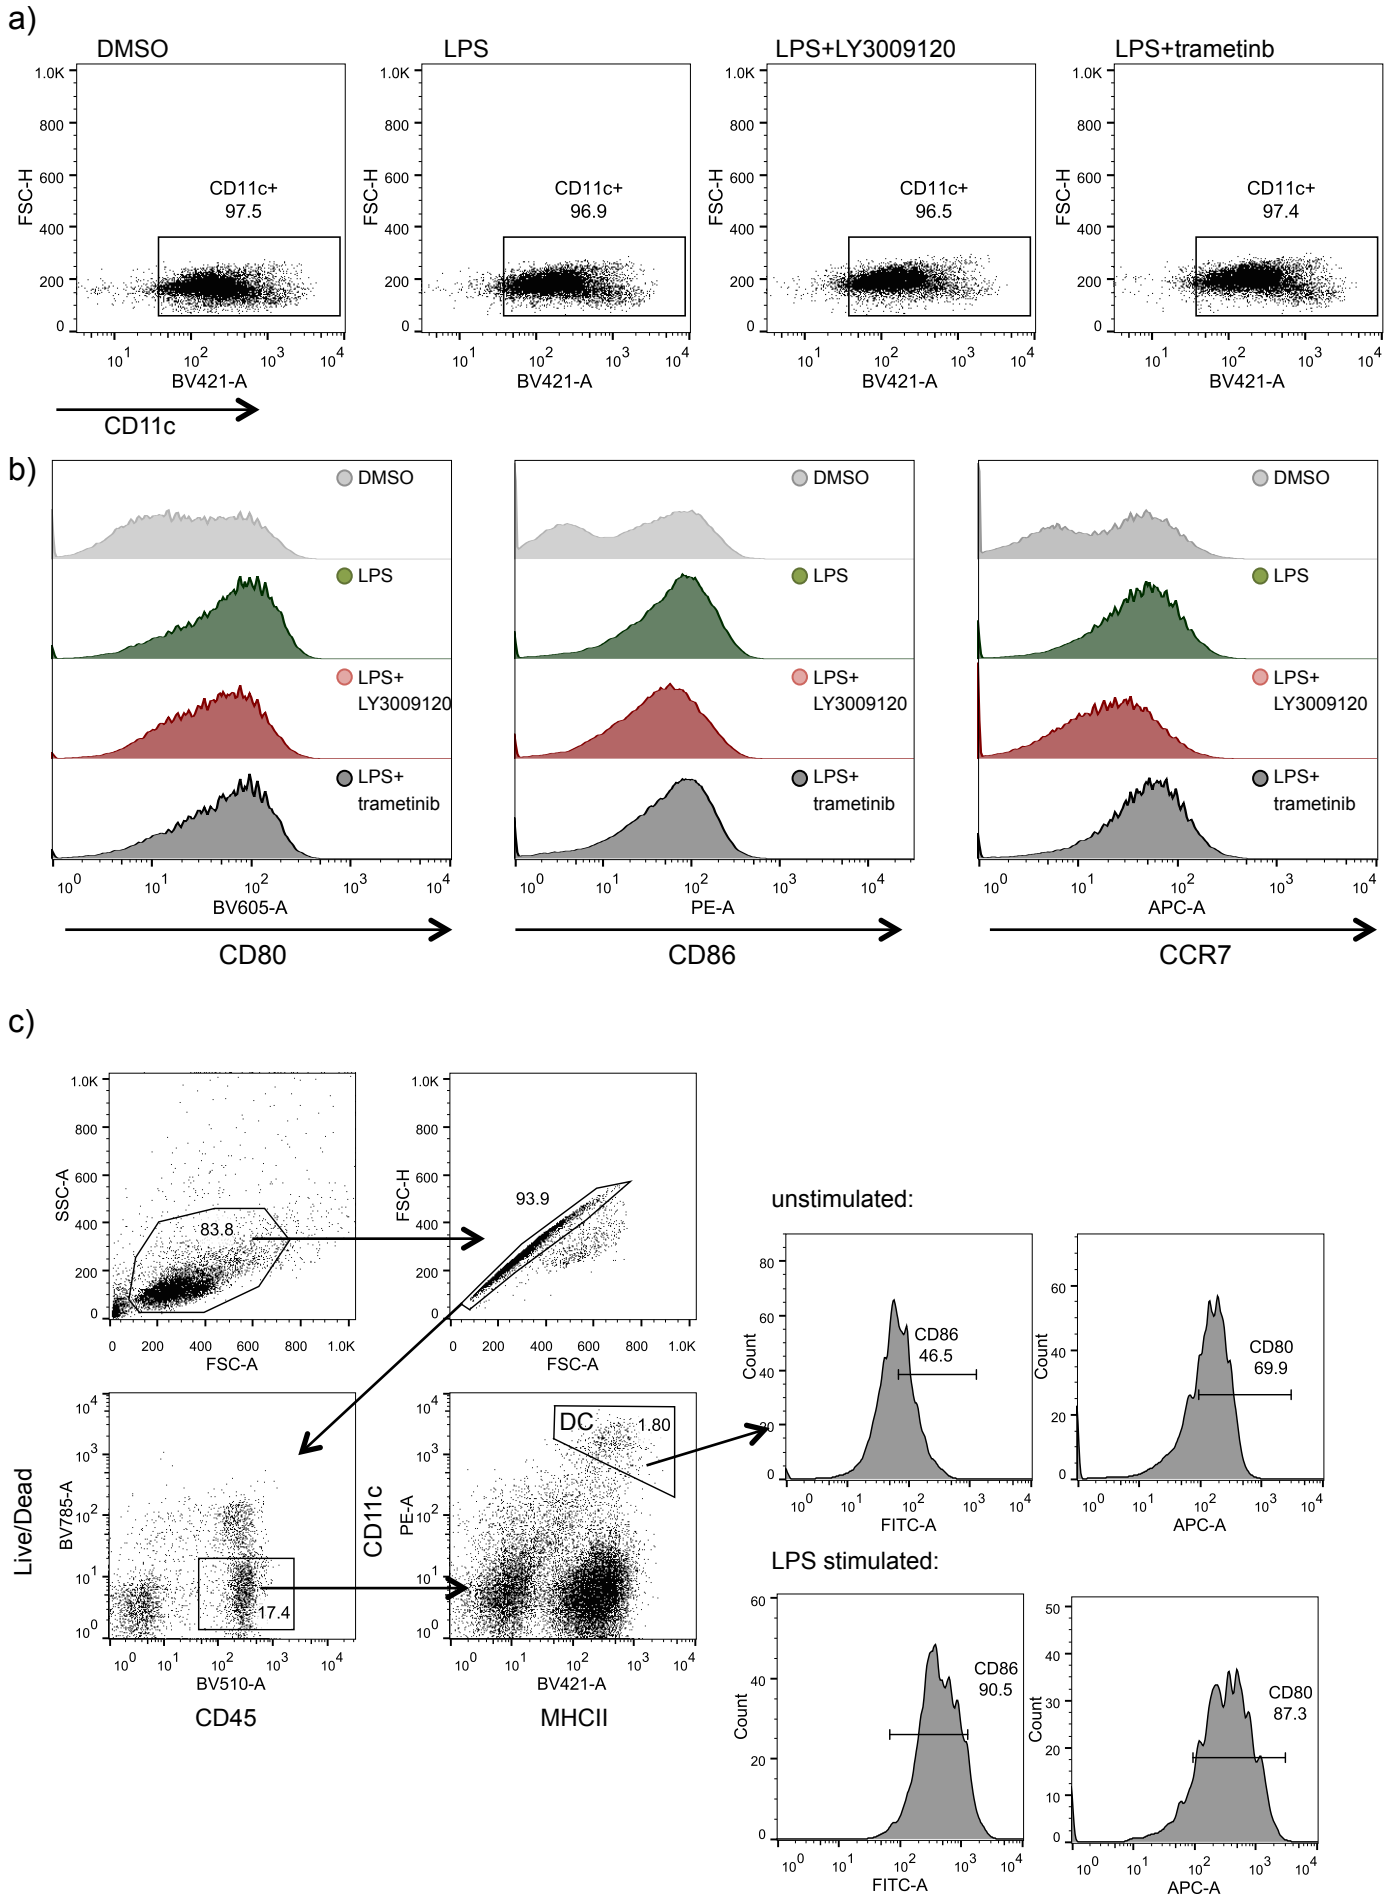

Supplement: 41418_2019_416_MOESM2_ESM.pdf [file 41418_2019_416_MOESM2_ESM.pdf]
